# Supplementary material for: Patterns and representation in play-based learning: a systematic meta-synthesis of empirical studies in K-13+ settings
Source: Frontiers journal article supplement (doi:10.3389/feduc.2025.1557001), 2025-03-12
Supplement: Supplementary_file_1.docx [file Supplementary_file_1.docx]

**Supplementary File**

**Articles Included in the Meta-Synthesis**

Adamson, G. S., Rouse, E., & Emmett, S. (2021). Recalling childhood: transformative learning about the value of play through active participation. *Journal of Early Childhood Teacher Education, 42*(4), 362-380. https://doi.org/10.1080/10901027.2020.1754309

Anderson, R., & Thomas, H. (2021). Engaging with play-based learning. *Journal of Teacher Action Research, 7*(2), 56-68.

Ardi, P., & Rianita, E. (2022). Leveraging gamification into EFL grammar class to boost student engagement. *Teaching English with Technology, 22*(2), 90–114.

Arnab, S., Clarke, S., & Morini, L. (2019). Co-creativity through play and game design thinking. *Electronic Journal of e-Learning, 17*(3), 184-198. https://doi.org/10.34190/JEL.17.3.002

Aslan, S., Agrawal, A., Alyuz, N., Chierichetti, R., Durham, L. M., Manuvinakurike, R., Okur, E., Sahay, S., Sharma, S., Sherry, J., Raffa, G., & Nachman, L. (2022). Exploring Kid Space in the wild: A preliminary study of multimodal and immersive collaborative play-based learning experiences. *Educational Technology Research and Development, 70*(1), 205–230. https://doi.org/10.1007/s11423-021-10072-x

Baker, M., & Ryan, J. (2021). Playful provocations and playful mindsets: teacher learning and identity shifts through playful participatory research. *International Journal of Play, 10*(1), 6-24. https://doi.org/10.1080/21594937.2021.1878770

Barekat, N. A. (2023). The effect of play-based learning methods on math learning of sixth-grade elementary students. *International Journal of Curriculum and Instruction, 15*(1), 98–105.

Bennett, J., & Burridge, P. (2018). Developing Timorese early years teachers’ pedagogy through an Australian mentoring programme. *International Journal of Early Years Education, 26*(1), 104-118. https://doi.org/10.1080/09669760.2017.1343133

Blucher, M., Aspden, K., & Jackson, J. (2018). Play-based learning in an Aotearoa New Zealand classroom: Child, parent, teacher and school leader perspectives. *Set: Research Information for Teachers*, (3), 51–59. https://doi.org/10.18296/set.0118

Borsos, E. (2019). The gamification of elementary school biology: a case study on increasing understanding of plants, *Journal of Biological Education, 53*(5), 492-505. https://doi.org/10.1080/00219266.2018.1501407

Boysen, M. S. W., Knage, M., Egelund, K. S., Lund, O., & Skovbjerg, H. M. (2022). Treehouses and superheroes: A design-based study of psychological ownership in collaborative creativity through exchanges of presents. *Thinking Skills & Creativity, 46,* N.PAG. https://doi.org/10.1016/j.tsc.2022.101198

Boysen, M. S. W., Lund, O., Jørnø, R. L., & Skovbjerg, H. M. (2023). The role of expertise in playful learning activities: A design-based self-study within teacher education aimed at the development of tabletop role-playing games. *Teaching & Teacher Education, 128*,

Bustamante, A. S., Begolli, K. N., Alvarez-Vargas, D., Bailey, D. H., & Richland, L. E. (2022). Fraction ball: Playful and physically active fraction and decimal learning. *Journal of Educational Psychology, 114*(6), 1307–1320. https://doi.org/10.1037/edu0000714.supp

Carpio Cañada, J., Mateo Sanguino, T. J., Merelo Guervós, J. J., & Rivas Santos, V. M. (2015). Open classroom: enhancing student achievement on artificial intelligence through an international online competition. *Journal of Computer Assisted Learning, 31*(1), 14-31. https://doi.org/10.1111/jcal.12075

Cheeseman, J. (2019). Young children are natural inquirers: Posing and solving mathematical problems. *Waikato Journal of Education, 25*(2), 11-22. https://doi.org/10.15663/wje.v24i2.664

Cheng, V. M. (2011). Infusing creativity into Eastern classrooms: Evaluations from student perspectives. *Thinking Skills and Creativity, 6*(1), 67–87.

Choi, J. H., Payne, A., Hart, P., & Brown, A. (2019). Creative risk‐taking: Developing strategies for first year university students in the creative industries. *International Journal of Art & Design Education, 38*(1), 73–89. https://doi.org/10.1111/jade.12169

Choi, B., & Young, M. F. (2021). TPACK-L: teachers’ pedagogical design thinking for the wise integration of technology. *Technology, Pedagogy and Education, 30*(2), 217-234. https://doi.org/10.1080/1475939X.2021.1906312

Cohrssen, C., & Tayler, C. (2016). Early childhood mathematics: A pilot study in preservice teacher education. *Journal of Early Childhood Teacher Education, 37*(1), 25-40. https://doi.org/10.1080/10901027.2015.1131208

Danniels, E., & Pyle, A. (2023). Inclusive play-based learning: Approaches from enacting kindergarten teachers. *Early Childhood Education Journal, 51*(7), 1169–1179. https://doi.org/10.1007/s10643-022-01369-4

Danniels, E., & Pyle, A. (2023). Teacher perspectives and approaches toward promoting inclusion in play-based learning for children with developmental disabilities. *Journal of Early Childhood Research, 21*(3), 288-302. https://doi.org/10.1177/1476718X221149376

de Koning-Veenstra, B., Steenbeek, H. W., van Dijk, M. W. G., & van Geert, P. L. C. (2014). Learning through movement: A comparison of learning fraction skills on a digital playful learning environment with a sedentary computer-task. *Learning and Individual Differences, 36*, 101–109. https://doi.org/10.1016/j.lindif.2014.10.002

Ethridge, E. A., Malek-Lasater, A. D., & Kwon, K. A. (2022). Fostering play through virtual teaching: challenges, barriers, and strategies. Early Childhood Education Journal, 1-11. https://doi.org/10.1007/s10643-022-01419-x

Fourie, J., & Wilson, C. (2021). Playing games in a masters class: Experiences of student educational psychologists. *Perspectives in Education, 39*(4), 218-235. https://doi.org/10.18820/2519593X/pie.v39.i4.15

Galbraith, J. (2022). “A prescription for play”: developing early childhood preservice teachers’ pedagogies of play. *Journal of Early Childhood Teacher Education, 43*(3), 474-494. https://doi.org/10.1080/10901027.2022.2054035

Gouseti, A., Abbott, D., Burden, K., & Jeffrey, S. (2020). Adopting the use of a legacy digital artefact in formal educational settings: Opportunities and challenges. *Technology, Pedagogy and Education, 29*(5), 613–629. https://doi.org/10.1080/1475939X.2020.1822435

Hakkarainen, P. (2008). The challenges and possibilities of a narrative learning approach in the Finnish early childhood education system. *International Journal of Educational Research, 47*(5), 292–300. https://doi.org/10.1016/j.ijer.2008.12.008

Henderson, L. (2022). Learning to play with film: Play-based learning in a tertiary film studies classroom. *Film Education Journal, 5*(2), 93-101. https://doi.org/10.14324/FEJ.05.2.03

Hollenstein, L., Thurnheer, S., & Vogt, F. (2022). Problem solving and digital transformation: Acquiring skills through pretend play in kindergarten. *Education Sciences, 12*(2), 92. https://doi.org/10.3390/educsci12020092

Howe, S. (2016). What play means to us: Exploring children’s perspectives on play in an English Year 1 classroom. *European Early Childhood Education Research Journal, 24*(5), 748-759. https://doi.org/10.1080/1350293X.2016.1213567

Isabelle, A. D., Russo, L., & Velazquez-Rojas, A. (2021). Using the engineering design process (EDP) to guide block play in the kindergarten classroom: exploring effects on learning outcomes. *International Journal of Play, 10*(1), 43-62. https://doi.org/10.1080/21594937.2021.1878772

Jay, J. A., & Knaus, M. (2018). Embedding play-based learning into junior primary (Year 1 and 2) curriculum in WA. *Australian Journal of Teacher Education (Online), 43*(1), 112-126. https://doi.org/10.14221/ajte.2018v43n1.7

Jayman, M., & Ventouris, A. (2020). Dealing children a helping hand with Book of Beasties: The mental wellness card game. *Educational and Child Psychology, 37*(4). https://doi.org/10.53841/bpsecp.2020.37.4.69

Jensen, H., & Rørbæk, L. L. (2022). Smoothing the path to practice: Playful learning raises study happiness and confidence in future roles among student teachers and student ECE teachers. *Studies in Educational Evaluation, 74*, 101156. https://doi.org/10.1016/j.stueduc.2022.101156

Jhan, Y. C., Luarn, P., & Lin, H. W. (2023). A study on EMBA students’ cognitive and decision-making models in learning through play. *The International Journal of Management Education, 21*(1), 100765. https://doi.org/10.1016/j.ijme.2023.100765

Johnston, O., Wildy, H., & Shand, J. (2023). Teenagers learn through play too: communicating high expectations through a playful learning approach. *Australian Educational Researcher (Springer Science & Business Media B.V.), 50*(3), 921–940. https://doi.org/10.1007/s13384-022-00534-3

Johnstone, A. (2022). An inquiry into teachers' implementation of play-based learning aligned approaches within senior primary classes. *Kairaranga, 23*(1), 17-34. https://doi.org/10.54322/kairaranga.v23i1.331

Kangas, M. (2010). Creative and playful learning: Learning through game co-creation and games in a playful learning environment. *Thinking Skills and Creativity, 5*(1), 1–15. https://doi.org/10.1016/j.tsc.2009.11.001

Kangas, M., Siklander, P., Randolph, J., & Ruokamo, H. (2017). Teachers’ engagement and students’ satisfaction with a playful learning environment. *Teaching and Teacher Education, 63*, 274–284. https://doi.org/10.1016/j.tate.2016.12.018

Ke, F., Xie, K., & Xie, Y. (2016). Game‐based learning engagement: A theory‐and data‐driven exploration. *British Journal of Educational Technology, 47*(6), 1183-1201.https://doi.org/10.1111/bjet.12314

Keung, C. P. C., & Fung, C. K. H. (2021). Pursuing quality learning experiences for young children through learning in play: how do children perceive play?. *Early Child Development and Care, 191*(4), 583-597. https://doi.org/10.1080/03004430.2019.1633313

Kim, B., & Ho, W. (2018). Emergent social practices of Singapore students: The role of laughter and humour in educational gameplay. *International Journal of Child-Computer Interaction, 16*, 85-99. https://doi.org/10.1016/j.ijcci.2018.01.001

Kobylak, K., & Kalyn, B. (2017). Play and exploration in grade one: Extending the principles of early learning. *Journal of Childhood Studies, 42*(1), 32-44. https://doi.org/10.18357/jcs.v42i1.16885

Kotsopoulos, D., Makosz, S., Zambrzycka, J., & McCarthy, K. (2015). The effects of different pedagogical approaches on the learning of length measurement in kindergarten. *Early Childhood Education Journal, 43*, 531-539. https://doi.org/10.1007/s10643-014-0686-x

Kumpulainen, K., & Kajamaa, A. (2020). Sociomaterial movements of students' engagement in a school's makerspace. *British Journal of Educational Technology, 51*(4), 1292-1307. ttps://doi.org/10.1111/bjet.12932

Lin, Y. S. (2014). A third space for dialogues on creative pedagogy: Where hybridity becomes possible. *Thinking Skills and Creativity, 13*, 43-56. https://doi.org/10.1016/j.tsc.2014.03.001

Liu, I. F. (2020). The study of intention to learn in game-based learning with a smartphone. *International Journal of Distance Education Technologies (IJDET), 18*(3), 25-41. https://doi.org/10.4018/IJDET.2020070102

MacDonald, K., & Breunig, M. (2018). Back to the Garten: Ontario kindergarteners learn and grow through schoolyard pedagogy. *Journal of Outdoor & Environmental Education, 21*(2), 133–151. https://doi.org/10.1007/s42322-018-0011-z

Macdonald, I., Malone, E., & Firth, R. (2022). How can scientists and designers find ways of working together? A case study of playful learning to co-design visual interpretations of immunology concepts. *Studies in Higher Education, 47*(9), 1980–1996. https://doi.org/10.1080/03075079.2021.2020745

Malegiannaki, I., Daradoumis, T., & Retalis, S. (2021). Using a story-driven board game to engage students and adults with cultural heritage. *International Journal of Game-Based Learning (IJGBL), 11*(2), 1-19. https://doi.org/10.4018/IJGBL.2021040101

Marchetti, E. (2021). Are they playing? Analysing “play” in playful learning in occupational therapy education. *E-Learning and Digital Media, 18*(3), 290–306. https://doi.org/10.1177/2042753020980114

Martlew, J., Stephen, C., & Ellis, J. (2011). Play in the primary school classroom? The experience of teachers supporting children’s learning through a new pedagogy. *Early Years, 31*(1), 71-83. https://doi.org/10.1080/09575146.2010.529425

Miller, T. (2018). Developing numeracy skills using interactive technology in a play-based learning environment. *International Journal of STEM Education, 5*. https://doi.org/10.1186/s40594-018-0135-2

Mohamed, D. A., & Kandeel, M. M. (2023). Playful learning: Teaching the properties of geometric shapes through pop-up mechanisms for kindergarten. *International Journal of Education in Mathematics, Science and Technology, 11*(1), 179–197.

Moll, R. F. (2011). Affective learning in playful learning environments: Physics outreach challenges. *Children, Youth and Environments, 21*(2), 256-270. https://doi.org/10.1353/cye.2011.0023

Morgan, A. E., & Kennewell, S. E. (2006). Initial teacher education students’ views on play as a medium for learning--A divergence of personal philosophy and practice. *Technology, Pedagogy and Education, 15*(3), 307–320. https://doi.org/10.1080/14759390600923691

Mostowfi, S., Mamaghani, N. K., & Khorramar, M. (2016). Designing playful learning by using educational board game for children in the age range of 7-12: (A case study: Recycling and waste separation education board game). *International Journal of Environmental and Science Education, 11*(12), 5453–5476.

Murtagh, E. M., Sawalma, J., & Martin, R. (2022). Playful maths! The influence of play-based learning on academic performance of Palestinian primary school children. *Educational Research for Policy and Practice, 21*(3), 407-426. https://doi.org/10.1007/s10671-022-09312-5

Paldam, E., Roepstorff, A., Steensgaard, R., Lundsgaard, S. S., Steensig, J., & Gebauer, L. (2022). A robot or a dumper truck? Facilitating play-based social learning across neurotypes. *Autism & Developmental Language Impairments, 7*. https://doi.org/10.1177/23969415221086714

Paxton, K. (2022). Play and write: A guided-play writing workshop in a South African classroom. *American Journal of Play, 14*(2), 149–172.

Pelletier, J., & Fesseha, E. (2019). The impact of full-day kindergarten on learning outcomes and self-regulation among kindergarten children at risk for placement in special education. *Exceptionality Education International, 29*(3), 42-56. https://doi.org/10.5206/eei.v29i3.9386

Prioletta, J., & Pyle, A. (2017). Play and gender in Ontario kindergarten classrooms: Implications for literacy learning. *International Journal of Early Years Education, 25*(4), 393–408. https://doi.org/10.1080/09669760.2017.1390446

Pui-Wah, D. C., & Stimpson, P. (2004). Articulating contrasts in kindergarten teachers’ implicit knowledge on play-based learning. *International Journal of Educational Research, 41*(4/5), 339–352. https://doi.org/10.1016/j.ijer.2005.08.005

Pyle, A., & Alaca, B. (2018). Kindergarten children’s perspectives on play and learning. *Early Child Development and Care, 188*(8), 1063–1075. https://doi.org/10.1080/03004430.2016.1245190

Pyle, A., & Bigelow, A. (2014). Play in kindergarten: An interview and observational study in three Canadian classrooms. *Early Childhood Education Journal, 43*(5), 385–393. https://doi.org/10.1007/s10643-014-0666-1

Pyle, A., DeLuca, C., Danniels, E., & Wickstrom, H. (2020). A model for assessment in play-based kindergarten education. *American Educational Research Journal, 57*(6), 2251–2292. https://doi.org/10.3102/0002831220908800

Pyle, A., DeLuca, C., Danniels, E. (2017). A scoping review of research on play-based pedagogies in kindergarten education. *Review of Education 5*(3), 311–351. https://doi.org/10.1002/rev3.3097

Pyle, A., DeLuca, C., Wickstrom, H., & Danniels, E. (2022). Connecting kindergarten teachers’ play-based learning profiles and their classroom assessment practices. *Teaching and Teacher Education, 119*, 1–12. https://doi.org/10.1016/j.tate.2022.103855

Pyle, A., Poliszczuk, D., & Danniels, E. (2018). The challenges of promoting literacy integration within a play-based learning kindergarten program: Teacher perspectives and implementation. *Journal of Research in Childhood Education, 32*(2), 219-233. https://doi.org/10.1080/02568543.2017.1416006

Pyle, A., Prioletta, J., & Poliszczuk, D. (2018). The play-literacy interface in full-day kindergarten classrooms. *Early Childhood Education Journal, 46*(1), 117–127. https://doi.org/10.1007/s10643-017-0852-z

Qvortrup, A., Lomholt, R., Christensen, V., Lundtofte, T. E., & Nielsen, A. (2023). Playful learning during the reopening of Danish schools after Covid 19 closures. *Scandinavian Journal of Educational Research, 67*(5), 725–740. https://doi.org/10.1080/00313831.2022.2042850

Randolph, J. J., Kangas, M., Ruokamo, H., & Hyvönen, P. (2016). Creative and playful learning on technology-enriched playgrounds: an international investigation. *Interactive Learning Environments, 24*(3), 409–422. https://doi.org/10.1080/10494820.2013.860902

Rulyansah, A., Hidayat, M. T., Rihlah, J., Shari, D., & Mariati, P. (2023). Digital play for enhancing language learning in early grades. *Pegem Journal of Education and Instruction, 13*(2), 182-190. https://doi.org/10.47750/pegegog.13.02.22

Scalise, N., Daubert, E., & Ramani, G. (2019). benefits of playing numerical card games on head start children’s mathematical skills. *The Journal of Experimental Education, 88*(2), 200–220. https://doi.org/10.1080/00220973.2019.1581721

Scoarize, M. M. R., Contieri, B. B., Delanira-Santos, D., Zanco, B. F., & Benedito, E. (2022). An interdisciplinary approach to address aquatic environmental issues with young students from Brazil. *International Research in Geographical & Environmental Education, 31*(1), 38–52. https://doi.org/10.1080/10382046.2021.1943220

Sendra, A., Lozano-Monterrubio, N., Prades-Tena, J., & Gonzalo-Iglesia, J. L. (2021). Developing a gameful approach as a tool for innovation and teaching quality in higher education. *International Journal of Game-Based Learning (IJGBL), 11*(1), 53-66. https://doi.org/10.4018/IJGBL.2021010104

Shin, M. (2022). Reclaiming playful learning: exploring the perceptions of playful learning among early childhood preservice teachers. Asia-Pacific Journal of Research in Early Childhood Education, 16(3), 1-22. https://doi.org/10.17206/apjrece.2022.16.3.1

Sliogeris, M., & Almeida, S. C. (2019). Young children’s development of scientific knowledge through the combination of teacher-guided play and child-guided play. *Research in Science Education, 49*, 1569-1593. https://doi.org/10.1007/s11165-017-9667-6

Tam, P.-C. (2021). Blurring the play–drama boundary: A case study investigating the teaching and learning of a drama-integrated curriculum in a Hong Kong kindergarten. *Contemporary Issues in Early Childhood, 22*(4), 328–341. https://doi.org/10.1177/14639491211060559

van der Aalsvoort, G., & Broadhead, P. (2016). Working across disciplines to understand playful learning in educational settings. *Childhood Education, 92*(6), 483–493. https://doi.org/10.1080/00094056.2016.1251798

Verver, S. H., Vervloed, M. P. J., Yuill, N., & Steenbergen, B. (2020). Playful learning with sound‐augmented toys: Comparing children with and without visual impairment. *Journal of Computer Assisted Learning, 36*(2), 147–159. https://doi.org/10.1111/jcal.12393

Vogt, F., Hauser, B., Stebler, R., Rechsteiner, K., & Urech, C. (2018). Learning through play - pedagogy and learning outcomes in early childhood mathematics. *European Early Childhood Education Research Journal, 26*(4), 589–603. https://doi.org/10.1080/1350293X.2018.1487160

Wang, X., Young, G. W., Plechatá, A., Mc Guckin, C., & Makransky, G. (2023). Utilizing virtual reality to assist social competence education and social support for children from under-represented backgrounds. *Computers & Education, 201*, N.PAG. https://doi.org/10.1016/j.compedu.2023.104815

Wang, Y., Li, L., Fleer, M., & Ma, Y. (2023). Creating conditions for Chinese kindergarten Teacher’s professional development in play-based setting. *Early Years*, 1-17. https://doi.org/10.1080/09575146.2023.2205055

Wang, Z. & Hung, L. 2010. Kindergarten children’s number sense development through board games. *International Journal of Learning 17*(8), 19–31. https://doi.org/10.18848/1447-9494/CGP/v17i08/47181

*Whitton, N., & Langan, M. (2019). Fun and games in higher education: An analysis of UK student perspectives. *Teaching in Higher Education, 24*(8), 1000–1013. https://doi.org/10.1080/13562517.2018.1541885

Woodard, R., Diaz, A. R., Phillips, N. C., Varelas, M., Kotler, R., Tsachor, R. P., Rock, R., & Melchor, M. (2023). “I. Am. a. Star.”: exploring moments of muchness in children’s digital compositional play and embodied science learning. *English Teaching: Practice & Critique (Emerald Group Publishing Limited), 22*(2), 163–176. https://doi.org/10.1108/ETPC-08-2022-0101

Young, T. C., & Malone, K. (2023). Reconfiguring environmental sustainability education by exploring past/present/future pedagogical openings with preservice teachers. *Teaching in Higher Education, 28*(5), 1077-1094. https://doi.org/10.1080/13562517.2023.2197112
